# Supplementary material
Source: publisher site journal article supplement (https://www.spandidos-publications.com/4819/downloadSupplementary)

Figure S1. The flow cytometric plots. (A and B) BDMC decreased the cell viability of U-2 OS cells. Cells ( $8 \times 10^4$  cells/well) were incubated with BDMC (0, 2.5, 5, 7.5, 10, 15, 20 and  $40 \mu\text{M}$ ) for (A) 24 and (B) 48 h. Cells were harvested and stained with the propidium iodide solution and then the total cell viability was assessed using flow cytometric analysis. BDMC, bisdemethoxycurcumin.

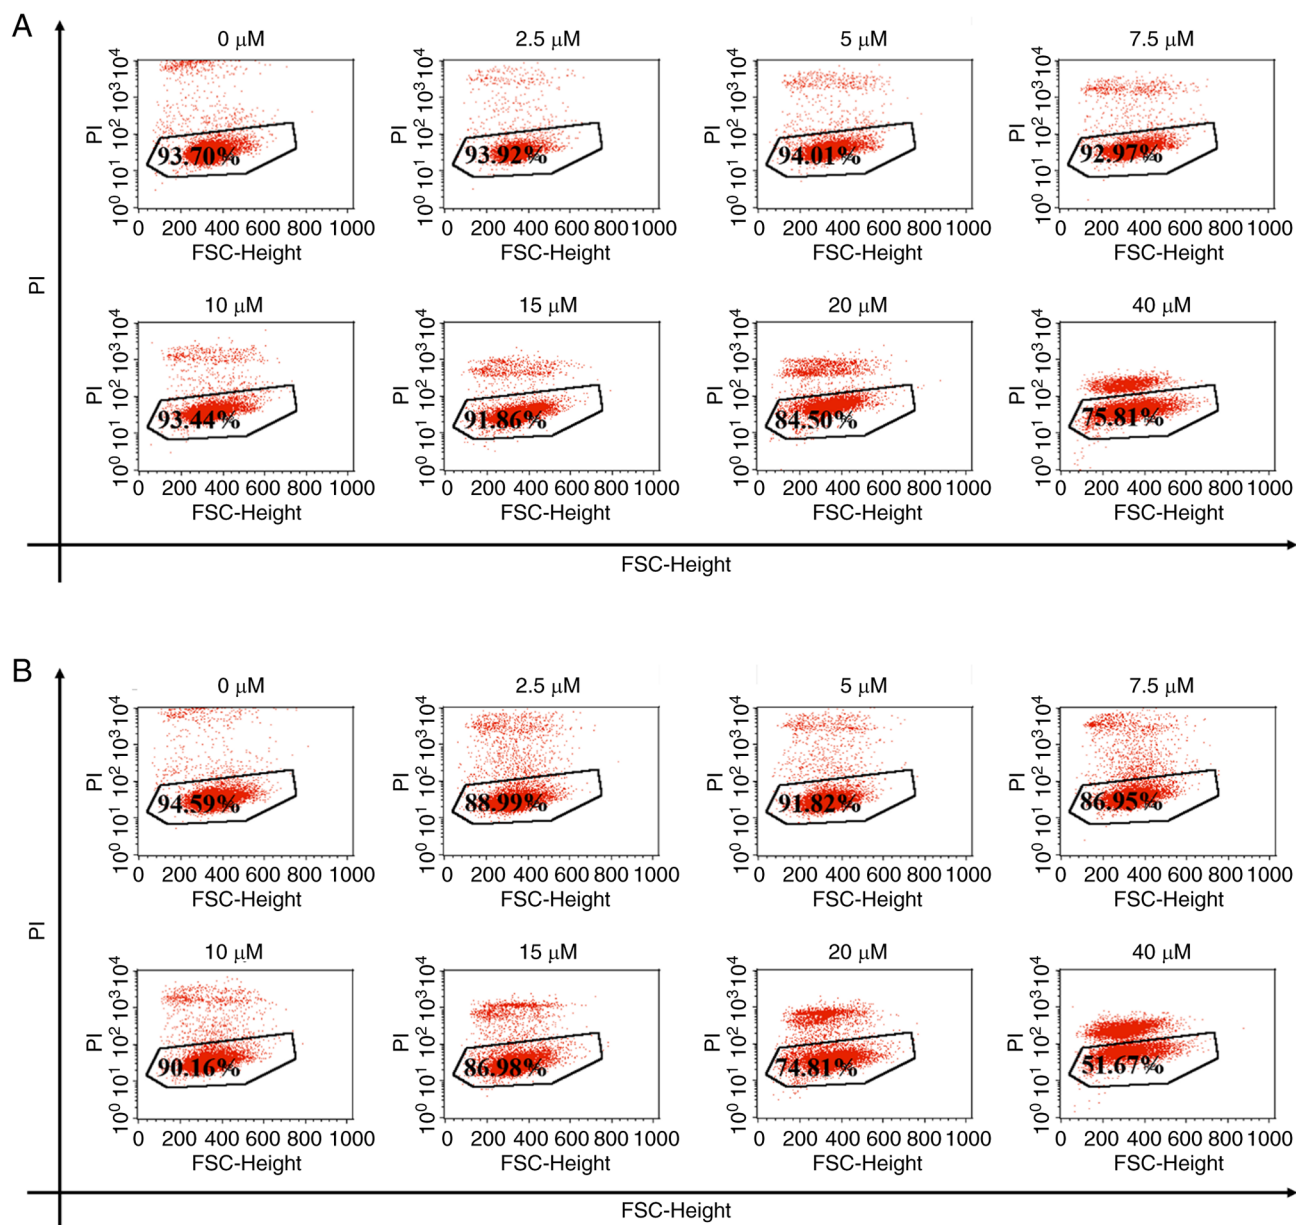

Supplement: Supplementary file 1 [file downloadSupplementary]
